# Supplementary figures and images for: The “Mosque Tower Pattern” for the Preoperative Marking of Reduction Mammaplasty
Source: PubMed Central journal article supplement — Plast Reconstr Surg Glob Open. 2024 Oct 11;12(10):e6230. doi: 10.1097/GOX.0000000000006230 (PMC11469906; doi:10.1097/gox.0000000000006230), 2024-10-11

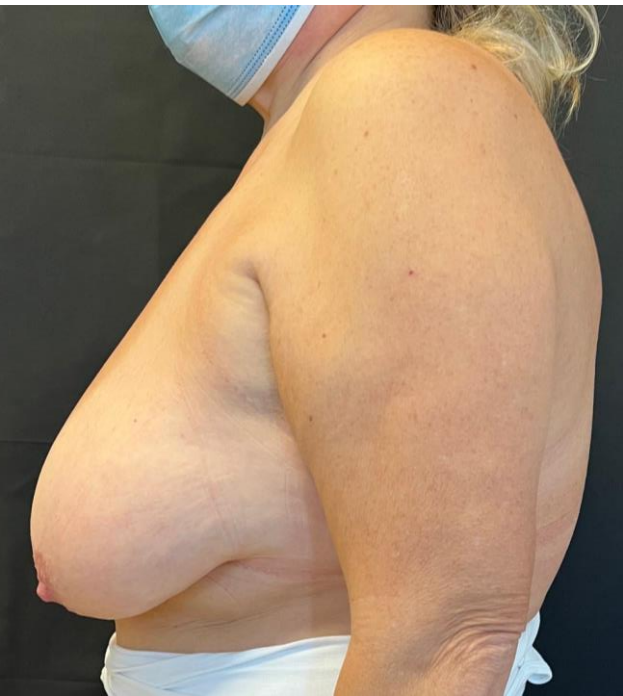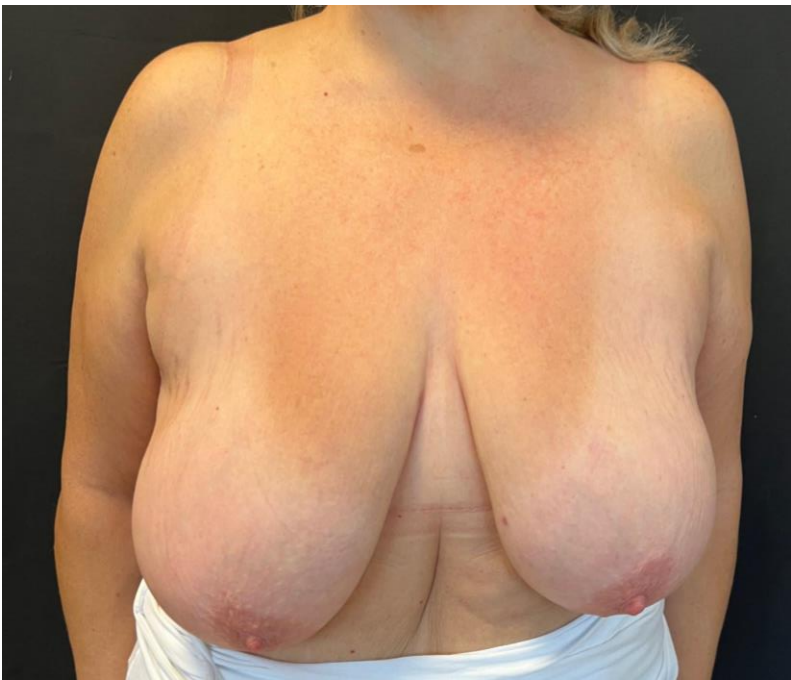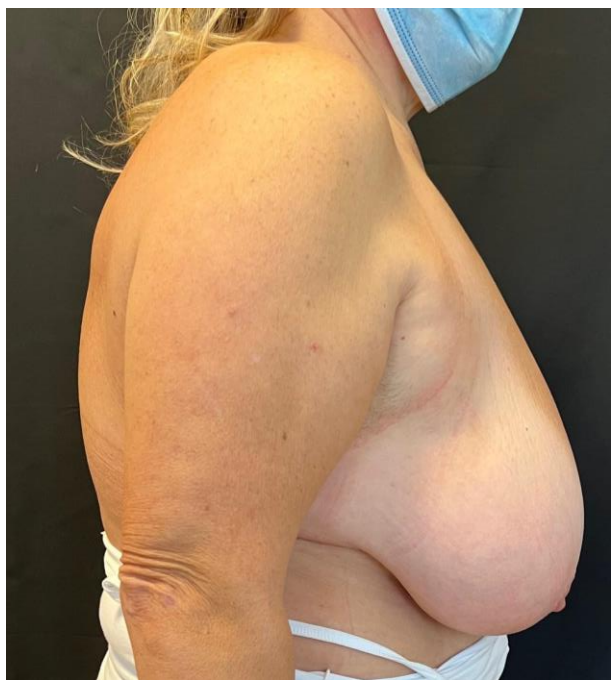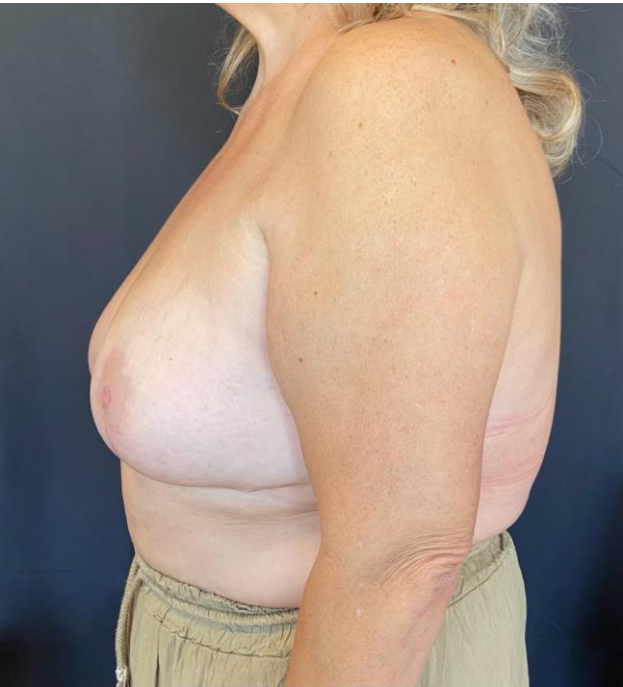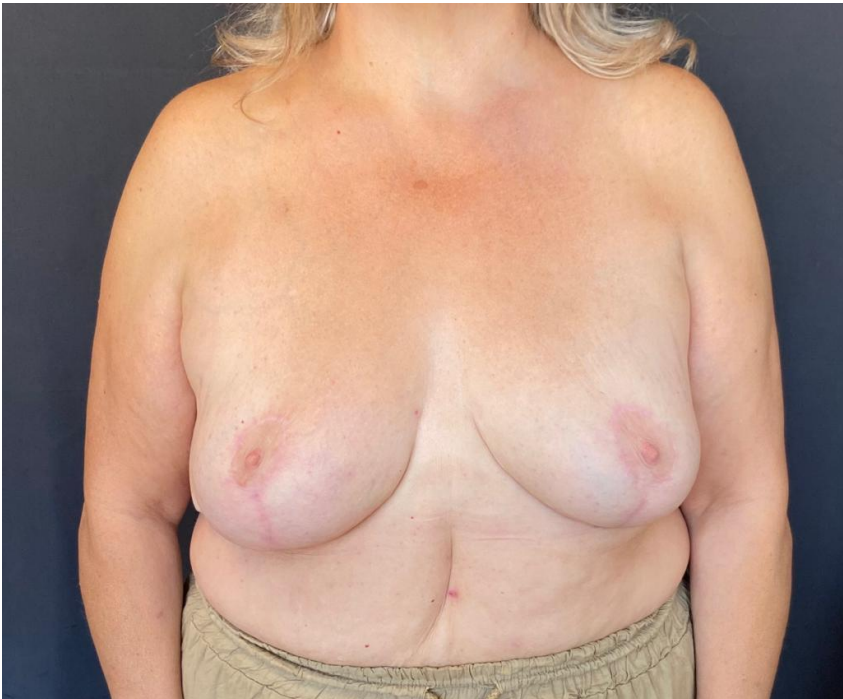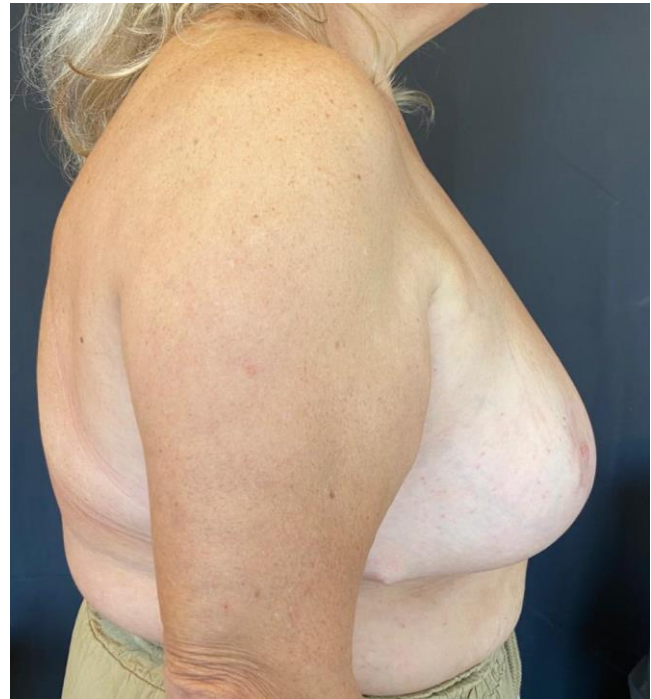

Supplement: gox-12-e6230-s003.pdf [file gox-12-e6230-s003.pdf]
